# Supplementary material for: Effect of physical exercise cessation on strength, functional, metabolic and structural outcomes in older adults: a protocol for systematic review and meta-analysis
Source: HighWire-hosted journal article supplement (doi:10.1136/bmjopen-2021-052913), 2021-12-01
Supplement: bmjopen-2021-052913supp001_data_supplement.pdf [file bmjopen-2021-052913supp001_data_supplement.pdf]

**Supplementary Material 1. Search strategy**

---

**Pubmed**

---

((("Elder"[All Fields] OR "Elderly"[All Fields] OR "older adults"[All Fields]) AND ("detrain"[All Fields] OR "detrained"[All Fields] OR "detraining"[All Fields] OR "Training cessation"[All Fields] OR "exercise interruption"[All Fields] OR "deconditioning"[All Fields] OR "retraining"[All Fields] OR "physical restraint"[All Fields]))

Translations: Detraining: "detrain"[All Fields] OR "detrained"[All Fields] OR "detraining"[All Fields]

---

**Web Of Science (Core Collection) and MEDLINE**

---

TS= (("Elder" OR "Elderly" OR "older adults") AND ((Detraining OR "Training cessation" OR "exercise interruption" OR "deconditioning" OR "retraining" OR "physical restraint"))))

---
